# Supplementary material for: Evaluation of cellular water exchange in a mouse glioma model using dynamic contrast-enhanced MRI with two flip angles
Source: PubMed Central journal article supplement (PMC9945648; doi:10.1038/s41598-023-29991-1), 2023-02-21
Supplement: 41598_2023_29991_MOESM1_ESM.pdf [file 41598_2023_29991_MOESM1_ESM.pdf]

# Evaluation of cellular water exchange in a mouse glioma model using Dynamic Contrast-Enhanced MRI with two flip angles

*Karl Kiser<sup>1\*</sup>, Jin Zhang<sup>1</sup>, Ayesha Bharadwaj Das<sup>1</sup>, James A. Tranos<sup>2</sup>, Youssef Zaim Wadghiri<sup>2</sup>, and S.  
Gene Kim<sup>1</sup>*

<sup>1</sup>Department of Radiology, Weill Cornell Medical College, New York, NY, United States

<sup>2</sup>Center for Biomedical Imaging (CBI), Center for Advanced Imaging Innovation and Research (CAI<sup>2</sup>R),  
Department of Radiology, NYU Grossman School of Medicine, New York, NY, USA

Send correspondence to:

*Karl Kiser*

E-mail: karl.j.kiser@gmail.com

Tel: (240) 753-8416

12 Pompanuck Way

Cambridge, NY, 12816

Grant sponsor: National Institutes of Health; Grant number: R01CA160620, R01CA219964, and  
UH3CA22869.

## Supplemental Figures

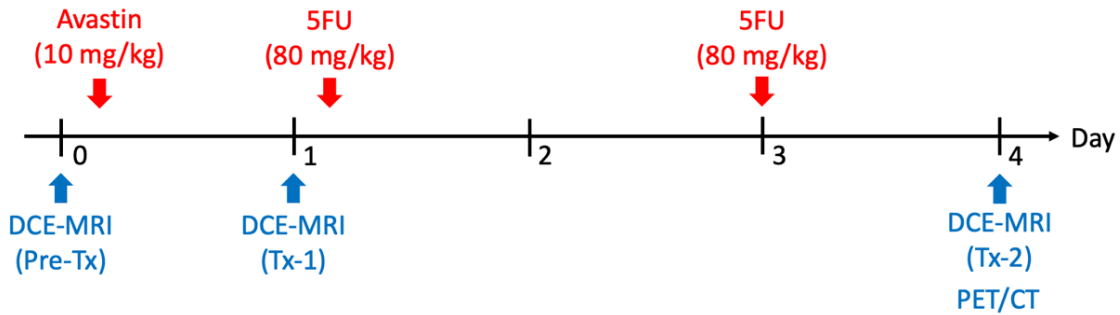

**Supplemental Figure S1.** Timing diagram for imaging protocol and treatment regime for the assessment of treatment response study. For the treatment group, pre-treatment DCE-MRI (Pre-Tx) was immediately followed by an intraperitoneal (IP) injection of bevacizumab (Avastin, Genentech) at 10 mg/kg. After 24 hours, mice were scanned again (Tx-1) and subsequently given an IP injection of fluorouracil (5FU, Fresenius Kabi) at 80mg/kg. A second dose of 5FU (80mg/kg) was given after 48 hours. Post-treatment DCE-MRI (Tx-2) was conducted 24 hours after the second 5FU treatment (i.e., four days after the pre-treatment DCE-MRI). The control group was treated with sodium chloride solution (10 ml/kg) and imaged at the same time points as the treatment group.

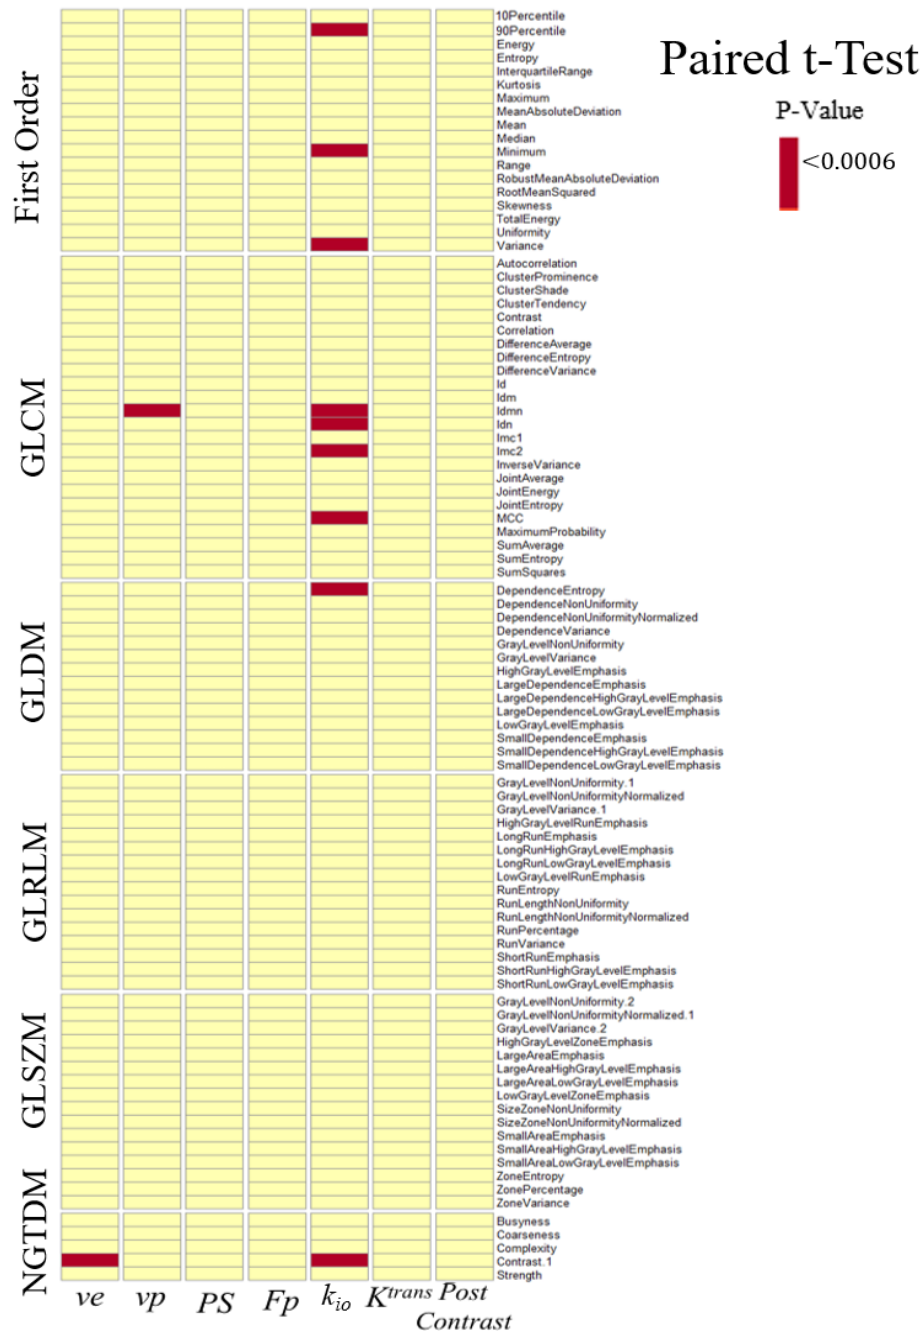

**Supplemental Figure S2.** Heatmap of the radiomics features with significant difference ( $p < 0.0006$ , depicted in red) between the control and treated cohorts. Among the 93 histogram and texture features extracted from the parameter maps, 9  $k_{io}$  features and one feature for  $v_e$  and  $v_p$  maps were found to be significantly different. This heatmap was partially created using R Core Team (2022). R: A language and environment for statistical computing. R Foundation for Statistical Computing, Vienna, Austria. URL <https://www.R-project.org/>.

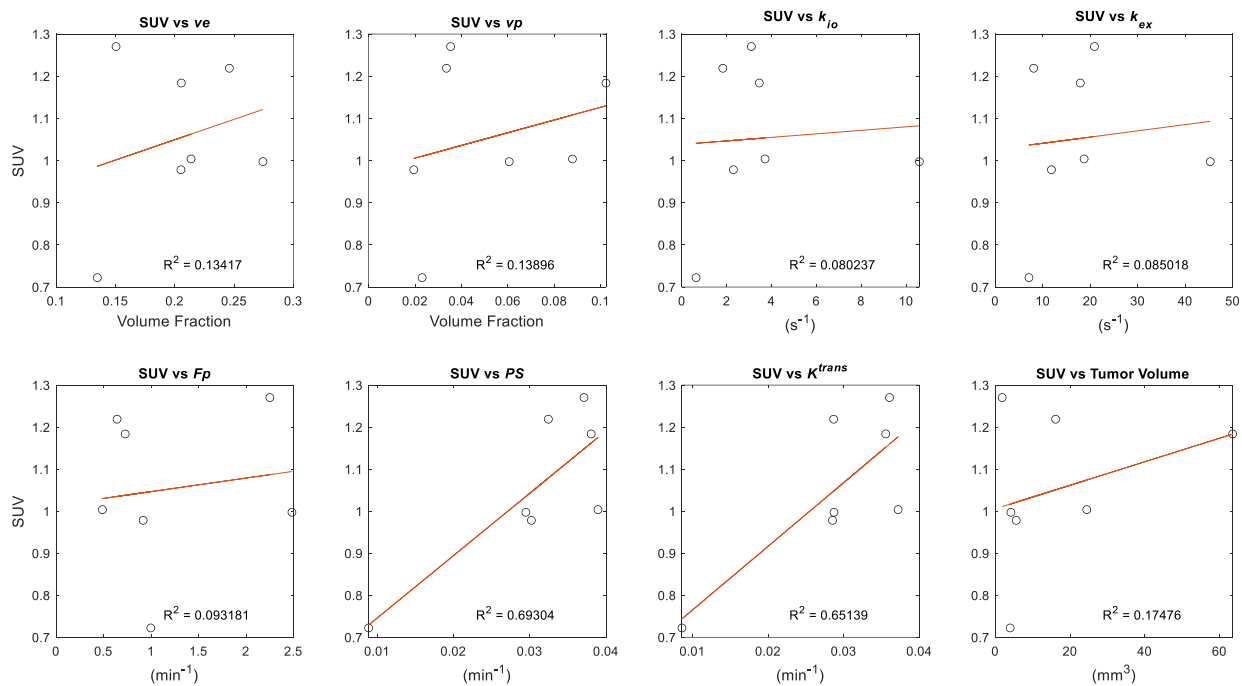

**Supplemental Figure S3.** Scatter plots to assess the association between the contrast kinetic parameters and  $k_{io}$  estimated from whole tumor DCE-MRI and whole tumor standardized uptake values (SUV) from FDG-PET. Data used in these plots are the median values of individual tumors (n=7). The red lines are linear regression lines with the  $R^2$  values shown in the plots.

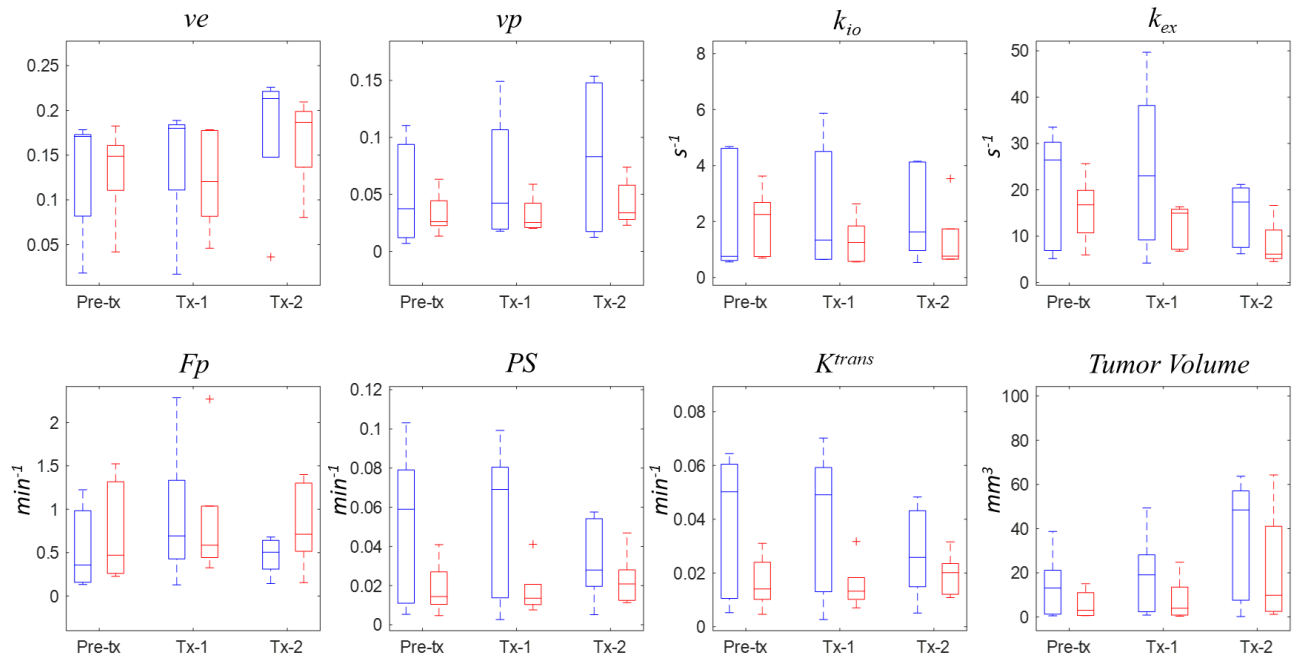

**Supplemental Figure S4.** Whole tumor contrast kinetic parameter and  $k_{io}$  median values for the control (blue, left) and treated (red, right) cohorts for pre-treatment (Pre-tx), 24 hours post bevacizumab (Tx-1) and post two doses of fluorouracil (Tx-2) time points.
